THE POTOMAC SCHOOL

MANUSCRIPT SUBMISSION

---

# The Optimization of a Natural Language Processing Approach for the Automatic Detection of Alzheimer's Disease Using GPT Embeddings

---

*Authors:*

BENJAMIN S. RUNDE  
Science Engineering Research Center,  
The Potomac School

AJIT ALAPATI  
Neuroscience Center of Excellence,  
School of Medicine,  
Louisiana State University,

NICOLAS G. BAZAN  
Neuroscience Center of Excellence,  
School of Medicine,  
Louisiana State University,

1

## Abstract

2 *As the impact of Alzheimer’s disease (AD) is projected to grow in the coming decades as the*  
3 *world’s population ages, the development of noninvasive and cost-effective methods of detecting*  
4 *AD is essential for the early prevention and mitigation of the progressive disease, alleviating*  
5 *its expected global impact. This study analyzes audio processing techniques and transcription*  
6 *methodologies to optimize the detection of AD through the natural language processing (NLP) of*  
7 *spontaneous speech. We enhanced audio fidelity using Boll Spectral Subtraction and evaluated*  
8 *the transcription accuracy of state-of-the-art AI services—locally-based Wav2Vec and Whisper,*  
9 *alongside cloud-based IBM Cloud and Rev AI—against traditional manual transcription*  
10 *methods. The choice between local and cloud-based solutions hinges on a trade-off between*  
11 *privacy, ongoing costs, and computational requirements. Leveraging OpenAI’s GPT for word*  
12 *embeddings, we enhanced the training of Support Vector Machine (SVM) classifiers, which*  
13 *were crucial in analyzing transcripts and refining detection accuracy. Our findings reveal that*  
14 *AI-driven transcriptions significantly outperform manual counterparts when classifying AD and*  
15 *Control samples, with Wav2Vec using enhanced audio exhibiting the highest accuracy and F-1*  
16 *scores (0.99 for both metrics) for locally based systems and Rev AI using unenhanced audio*  
17 *leading cloud-based methods with comparable precision (0.96 for both metrics). The study*  
18 *also uncovers the detrimental effect of including interviewer speech in recordings on model*  
19 *performance, advocating for the exclusion of such interactions to improve data quality for AD*  
20 *classification algorithms. Our comprehensive evaluation demonstrates that AI transcription*  
21 *(both Cloud and Local) and NLP technologies in their current forms can classify AD, as well*  
22 *as probable AD and mild cognitive impairment (MCI), a prodromal stage of AD, accurately*  
23 *but suffer from a lack of available training data. The insights garnered from this research lay*  
24 *the groundwork for future advancements in the noninvasive monitoring and early detection of*  
25 *cognitive impairments through linguistic analysis.*

## 26 1. Introduction

27 Alzheimer’s disease (AD) is an incurable neurological disorder that causes the degeneration of  
28 neurons in the brain that progresses first from dementia to the eventual inability of the brain to  
29 conduct basic bodily functions [1]. AD is the most common form of dementia, making up an  
30 estimated 60% to 80% of global cases of dementia. Currently, 55 million people globally suffer from  
31 dementia, a figure that is expected to grow to 139 million by 2050 [2]. With the world population  
32 aging, exemplified by countries such as the US, where people over the age of 65 are expected to

## Optimization of NLP Approach to Identify Alzheimer's Disease

---

33 increase by 50% halfway through the century, the social and economic impact of AD is expected to  
34 grow rapidly. Surprisingly, research suggests that 68% of this growing impact is expected to occur  
35 in low and middle-income countries.

36 Being a progressive disease, AD manifests initially with preclinical AD through subjective  
37 cognitive impairment (not all cases transition to AD), then mild cognitive impairment (MCI), and  
38 finally Dementia (which continually worsens over time), making it paramount that the disease  
39 be detected as early as possible in order to slow its progression and impact [1]. Currently, the  
40 diagnosis of AD using conventional clinical methods requires a specialty clinic, which can be  
41 invasive, expensive, and time-consuming. Additionally, these methods are often inaccurate and not  
42 cost-effective, particularly in identifying the early stages of the disease. Furthermore, nonspecialist  
43 clinicians often struggle to accurately identify early AD and MCI. As a result, there is a growing  
44 demand for noninvasive and/or cost-effective tools that can ascertain individuals in the preclinical or  
45 early clinical stages of AD, allowing for early interventions that could improve lifestyle and evolving  
46 pharmacological treatments. This is particularly important for lower-income individuals who may  
47 have fewer resources to cope with AD, and therefore, a more effective, accurate, and cost-effective  
48 way of detecting early AD is necessary [3].

49 As the stages of AD progress, aphasia (the inability to understand or formulate language) and  
50 dysarthria (the inability to write), some of AD's most common symptoms, become worse, being  
51 marked by a predictable set of changes. Firstly, language and speech are impaired by the inability to  
52 find certain words, most commonly those pertaining to items or people the patient interacts with  
53 often, causing an increase in the use of pauses and filler words. In later stages, these symptoms are  
54 exacerbated, and the patient's verbal acuteness and fluency are significantly impaired [4]. While  
55 some studies have shown that not all facets of speech and language change drastically after the first  
56 stages of the disease, the linguistic quality and complexity of the content of patients' speech does,

## Optimization of NLP Approach to Identify Alzheimer's Disease

---

57 making it possible for artificial intelligence (AI) to conduct natural language processing (NLP) tasks,  
58 for the automatic detection of AD (ADAD), based partially or entirely of the patient language [5, 6].

59 NLP is a cross-disciplinary technique that aims to enable AI, specifically through Large Language  
60 Models (LLM), to understand and process text, enabling it to convey meaning to other models that  
61 can create summaries, responses, or, in this case, classify text. Thanks to the massive advances  
62 in LLMs and AI as a whole, in recent years, NLP methods have improved drastically, enabling  
63 models to understand deeper and more complex semantic features [7]. To perform NLP, most  
64 models use word embeddings, which are N-dimensional vector representations of words (Fig. 1).  
65 Embeddings allow for the usage of neural networks (NN) and other machine learning classifiers  
66 (MLC) to process language through semantic meaning, unlike other techniques that focus on the  
67 frequency of specific words, among other aspects [8]. One of the most advanced LLMs is OpenAI's  
68 Generative Pre-trained Transformer 3 (GPT 3), which is known for its use in the ChatGPT. Based on  
69 the GPT 3 architecture, OpenAI offers a set of highly advanced, cost-effective set of embedding  
70 models [9]. First-generation versions of these models have shown promising results when it comes  
71 to the NLP-based automatic detection of AD [10].

72 Past research into the automatic detection of AD using speech has focused on either using  
73 acoustic features or NLP techniques [10, 11]. While acoustic feature-based models have been shown  
74 to perform effectively, achieving accuracies of 63.6% in Chlasta and Wolk using a convolutional  
75 neural network (CNN) or 65.6% in Balugopalan and Novikova using a support vector machine (SVM)  
76 classifier, Balugopalan and Novikova showed that a word embedding or combination approach was  
77 more effective. They performed better in nearly all metrics using several machine learning classifiers,  
78 achieving an accuracy of 66.9% for embeddings and 69.2% for combination using SVM [12, 13].  
79 Cruz et al. used NLP techniques, specifically Sentence Embeddings, using Siamese BERT-Networks  
80 (SBERT) to create embeddings and test the effectiveness of several types of ML classifiers. They

## Optimization of NLP Approach to Identify Alzheimer's Disease

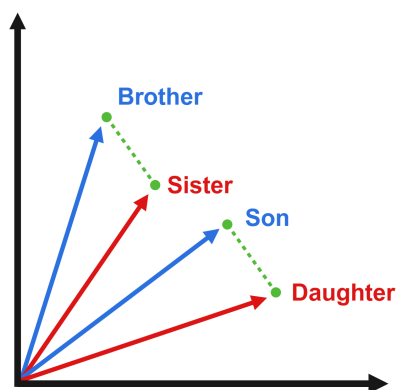

Figure 1: 2-Degree Vector Graphical Interpretation of N-Degree Vector Word Embeddings to Convey Linguistic Meaning in a Numerical Format. The difference in meaning between “Brother” and “Sister,” and “Son” and “Daughter” is identical and refers to the genders to which words in both groups of words apply; this equal difference can be seen through the identical vectors between them. Through these numerical interpretations of meanings, ML classifiers can be trained to detect patterns in text. Made with Bio Render.

81 found that SVM and neural networks (NN) were the most effective, achieving accuracies and F-1  
82 Scores (the harmonic mean of precision and recall) of 0.77 and 0.80 (SVM) and 0.78 and 0.76 (NN),  
83 respectively [14].

84 Agbavor and Liang built upon the research of both Balugopalan and Novikov and Cruz et al.  
85 Using audio files from the ADReSSO dataset, they extracted acoustic features, and they converted  
86 audio to text automatically using a transcription program, extracting embeddings using OpenAI  
87 first-generation embedding models. Using these acoustic features and embeddings, they trained  
88 multiple models using different combinations of NLP methods and ML classifiers. When comparing  
89 models, they found that the most effective model produced used only word embeddings and was  
90 classified using an SVM. This model was able to achieve an accuracy of 0.803 and 0.829 for accuracy  
91 and F-1 [10].

---

## Optimization of NLP Approach to Identify Alzheimer's Disease

92 This study aims to build off past research and optimize an NLP-based automatic AD detection  
93 system, increasing its performance. By optimizing the methods required to implement one of these  
94 systems, we hope to characterize the full potential of this technology in its current form while also  
95 identifying areas of improvement necessary to assist in the creation of a real-world application.  
96 Specifically, using audio files from the Pitt Corpus of the Dementia Bank Database, we aim to  
97 optimize the transcription process to increase the quality of the GPT word embeddings and the  
98 subsequent classification models that they train [15, 16]. To optimize these methodologies, we  
99 seek to evaluate the performances of several AI-based audio transcription systems, using cloud  
100 and locally-based transcription services, in addition to an audio enhancement system to aid the  
101 automatic transcription. We also aim to compare the performance of manual transcripts to those  
102 made with AI and seek to understand the impact of including interviewers in recordings. Using  
103 these various methodologies, we will characterize their performances in various classification tasks  
104 utilizing different diagnosis types.

## 105 **2. Methodology**

106 The overall approach of this study can be observed as follows, and a visual overview of the process  
107 can be found in Figure 2.

### 108 **2.1. Database Information**

109 For the study, we used the Pitt Corpus, which can be found in the Dementia Bank database [15].  
110 Dementia Bank is a database that is a part of the Talk Bank project that collects and makes available  
111 several different types of multimedia files that relate and can contribute to the study of language  
112 and communication of dementia [16]. The Pitt Corpus, which is derived from Becker et al., was

## Optimization of NLP Approach to Identify Alzheimer's Disease

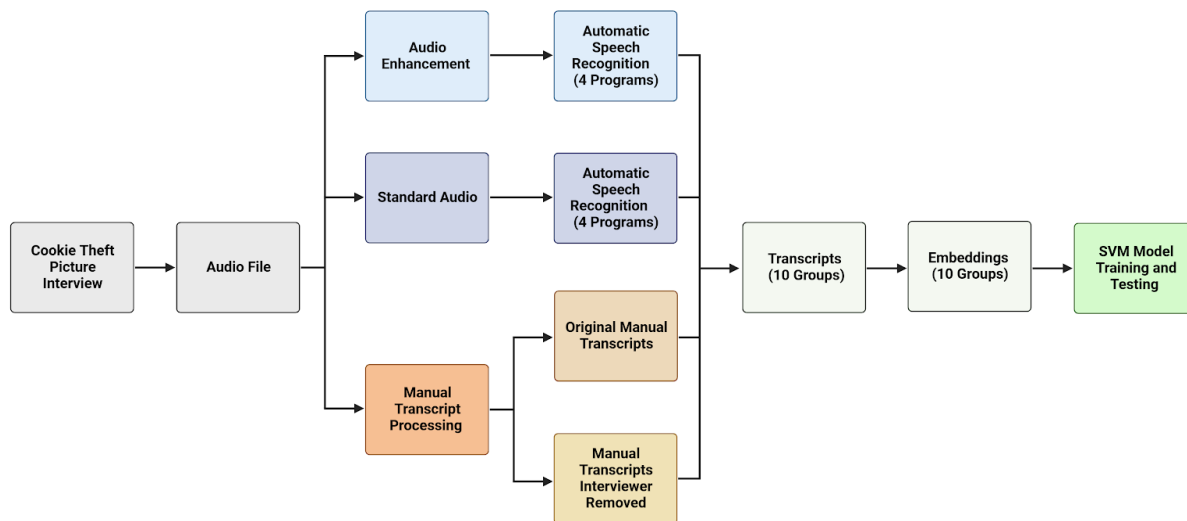

Figure 2: Overview of Methodology for Development and Optimization of Automatic Spontaneous Speech Based Detection of Alzheimer's Disease. Audio files of patients describing an image (the Cookie Theft Picture) were collected from the Pitt Corpus dataset of the Dementia Bank Database. The files included an original unedited version, an enhanced version using an implementation of Boll Spectral Subtraction [17], as well as a transcript in the CHAT file format. Each audio file (standard and enhanced) was transcribed using four different audio transcription services, while two original transcripts were generated, one from the original file and the other with the interviewer's comments removed. Creating a total of 10 transcription groups with different methodologies. These groups were turned into numerical representations using the second-generation Open AI embedding model and were then used to train several SVM classification models. Made with BioRender.

113 gathered as part of a larger project to study dementias at the University of Pittsburgh School of  
114 Medicine. According to the datasheet available with the Pitt Corpus, the dataset included 244  
115 samples of Probable AD, 87 samples of Possible AD, 16 samples of Vascular Dementia, 6 samples  
116 of other dementias, 12 samples of people who had cognitive problems yet lacked a diagnosis, 23  
117 samples of MCI, and 121 samples of a Control group [15].

118 For every individual interview (sample), an original audio file, an enhanced audio file, and a  
119 written transcript in CHAT file format of the patient describing the Cookie Theft image (Fig. 3)  
120 were included as well [15]. The Cookie Theft image is an image included in a subset of the Boston

## Optimization of NLP Approach to Identify Alzheimer's Disease

121 diagnostic aphasia examination that has risen to prominence thanks to its potential to reveal a wide  
122 range of cognitive and linguistic skills and deficits [18]. For this subtest, patients are shown a  
123 drawing of a mother cleaning dishes next to the sink. They are instructed to tell the interviewer all  
124 that they see going on in the picture. The Cookie Theft picture contains a wide range of describable  
125 features, including people, objects, and actions [19].

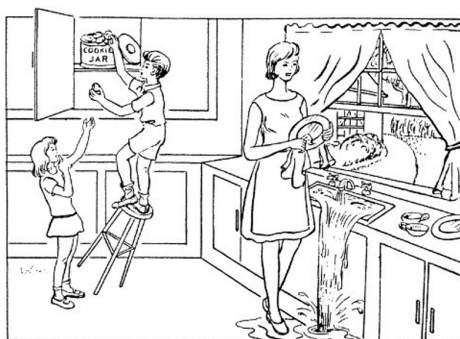

Figure 3: Cookie Theft Picture from the Boston Diagnostic Aphasia Examination. This picture is shown to patients when conducting the Boston Diagnostic Aphasia Examination. Patients are asked to describe everything that they see in either a written or oral format. Patient descriptions are then used to identify issues with speech and fluency [18].

## 126 2.2. Organizing Database Data

127 Upon accessing the files, we immediately noticed a discrepancy between the quantities of samples  
128 listed and those actually available. This meant that it would be impossible to sort through the  
129 included files using the available datasheet. Instead, we opted to write a program using the Python  
130 programming language that separated all of the original (or standard quality) and enhanced audio  
131 files as well as the manual transcripts by diagnosis type using the diagnosis information available in  
132 the CHAT file format of the transcripts. Once both types of audio files and the Chat transcripts  
133 were organized by diagnosis type, we recounted the total for each diagnosis type; we found 234  
134 samples of Probable AD, 21 samples of Possible AD, 42 samples of MCI, 3 samples of MCI with



---

## Optimization of NLP Approach to Identify Alzheimer's Disease

135 only memory problems, 5 samples of Vascular Dementia, 1 sample with another diagnosis, and  
136 242 samples of Control. Using this information, we removed the MCI with memory problem only,  
137 vascular dementia, and other diagnosis groups as they lacked enough data to train and test a model.

### 138 **2.3. Audio Enhancement**

139 Included in the Pitt Corpus were the original and enhanced versions of each interview's audio file  
140 [15]. Audio files were enhanced by removing background frequencies using an implementation  
141 of Boll Spectral Subtraction available for Mathworks MatLab program [17, 20]. Boll spectral  
142 subtraction works by assuming background frequencies and subtracting them from the original  
143 audio file. Spectral Subtraction offers a computationally efficient, consistent, and effective way  
144 of removing consistent background frequencies - it is not able to remove inconsistent and random  
145 audio artifacts [21]. This implementation of Boll Spectral Subtraction uses the first 0.25 seconds  
146 of audio, which is presumed by the program to be representative of background frequencies, and  
147 estimates the average background noise frequency using spectral averaging. Using this estimated  
148 frequency, or range of frequencies, it subtracts them from the original audio file. Following this, a  
149 secondary residual noise reduction is done to enhance the quality of the audio files [17].

### 150 **2.4. Manual Transcript Processing**

151 Manual Transcripts included in the Pitt Corpus data are complete documentation of the interview,  
152 including the interviewer's questions and the patient's responses. For example, the included transcript  
153 for interview ID 002-1 starts with the interviewer asking, "What do you see going on in that picture?"  
154 and the patient responds with, "Oh, I see the sink is running" [15]. Since the goal of the study is  
155 to optimize an NLP approach to the automatic detection of AD, removing the healthy, unaffected  
156 interviewer would remove any erroneous data that could hurt the performance of the models [22].

---

## Optimization of NLP Approach to Identify Alzheimer's Disease

157 While it would be nearly impossible to differentiate between the interviewer and the participant in  
158 an automatic transcript, the CHAT format of the included manual transcripts indicates the speaker  
159 for every line of text. Using this, we wrote a program in the Python programming language that  
160 created a complete, unchanged transcript and a version with the interviewer removed. These new  
161 transcripts were exported in an Excel format and only included text characters, removing any special  
162 characters included in the transcripts for CHAT file formatting conventions.

### 163 **2.5. Automatic Audio Transcription**

164 The original, or standard quality, and enhanced audio files were converted to text transcripts using 4  
165 separate Automatic Speech Recognition (ASR) programs (Fig. 4).

166 The first program that we used was a trained Wav2Vec model. This model was used and showed  
167 promising results in Agbavor and Liang [10]. The specific model that was used was the larger, most  
168 advanced model, facebook/wav2vec2-large-960h, which was trained and fine-tuned for transcription  
169 accuracy on 960 hours of Librispeech on 16kHz sampled speech audio [23]. This model can be  
170 found on the Hugging Face platform [24]. Audio files were transformed into waveforms using  
171 the Librosa library for Python [25]. Then, using the Wav2Vec2Tokenizer, waveforms were parsed  
172 into smaller, more accessible, and computationally efficient sections. These sections were then  
173 converted into text using the Wav2Vec2ForCTC submodel, which inherits and learns from the  
174 selected pre-trained model. Once all transcripts were created for both enhanced and standard audio,  
175 they were exported in Excel format.

176 The second model used for generating automatic transcriptions using ASR was Rev AI. This  
177 method, proposed by the Talk Bank project, attempts to streamline an efficient and user-friendly  
178 way of creating high-quality automatic transcriptions [26]. The user interface is created through a  
179 program called Docker, which creates an access portal on one's own device to upload files [27].

## Optimization of NLP Approach to Identify Alzheimer's Disease

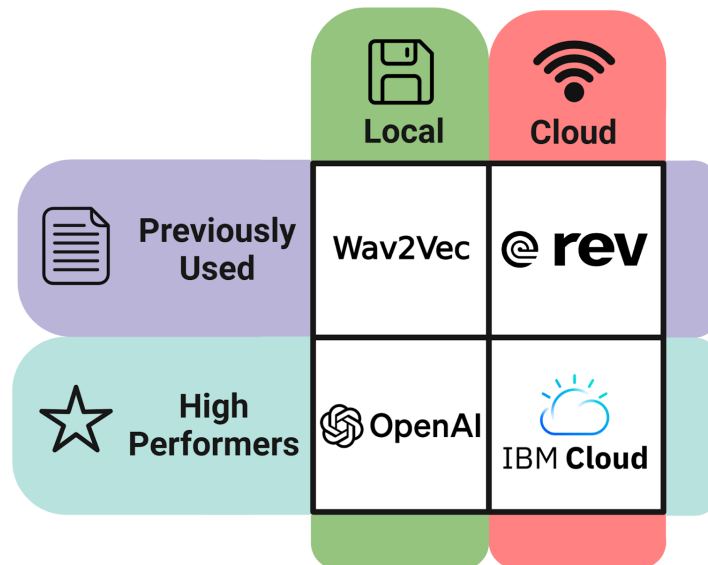

Figure 4: Automatic Speech Recognition Using Cloud Based and Local System Based Programs. Audio files were converted to text using 4 different ASR services. 2 were cloud-based, IBM Cloud Watson and Rev AI (using the talk bank developed interface), and used a pay-as-you-go model as computations were performed remotely. OpenAI Whisper and Hugging Face Wav2Vec transcribed files locally using the computer's own hardware and, accordingly, were free to use. At the same time, 2 of the ASR services (Wav2Vec and Rev AI) have been proposed in previous studies for this application, while the other 2 (Open AI and IBM Cloud) have been shown to be industry leaders in transcription performance. Made with BioRender.

180 Then, through the Docker portal, one uploads their Rev AI API key, allowing the interface to send the  
181 files to the Rev AI service, an industry-leading ASR program [28, 29]. Once the files are converted  
182 to text, they are immediately downloaded to one's computer in the CHAT file format. The Rev AI  
183 CHAT transcripts were then converted into Excel format.

184 The Third model we used was OpenAI's Whisper program. Whisper is an open-source, locally  
185 run ASR model that is designed to excel in a zero-shot learning environment. This means it's  
186 designed to work effectively without requiring a program to be prepared by training it with a  
187 downstream task through an approach such as fine-tuning, where one gives the pre-trained model a  
188 secondary dataset (in this case, a set of audio files and their correct transcripts) so that it can adjust

---

## Optimization of NLP Approach to Identify Alzheimer's Disease

189 to its task. Whisper was trained using 680,000 hours of multilingual and multitasking supervised  
190 data from the internet, allowing it to succeed on standard benchmarks in multiple languages [30].  
191 Using a program written in the Python programming language, audio files were processed through  
192 the whisper model, and the subsequent transcripts were exported in an Excel format.

193 The final model we used for the transcription of the standard and enhanced audio files was  
194 the IBM Cloud-based Watson Speech-to-Text (STT) service. An API key was created using IBM  
195 Cloud's web interface. Using this API key, as well as Librosa, to tokenize and partition audio files,  
196 we created a program in Python that accessed the Watson Speech to Text base model through the  
197 cloud [25, 31]. Once transcripts were created, they were exported in the Excel file format.

198 Of the ASR services used in this study, two were cloud-based, IBM Cloud Watson STT and  
199 Rev AI, and two were open-source and locally based, Wav2Vec and Whisper [23, 28, 30, 31]. The  
200 Cloud services are thought to be more advanced but require payment, using a pay-as-you-go model,  
201 as computations were performed remotely through each company's own servers and dedicated  
202 hardware. IBM Cloud Watson STT and Rev AI both used an affordable pricing scheme of \$0.02  
203 (USD) per minute of audio transcribed by each service [28, 31]. OpenAI Whisper and Hugging Face  
204 Wav2Vec transcribed files locally using the computer's own hardware and were free to use. For each  
205 type of ASR service, as in cloud or local, one service was selected for its use or proposed in past  
206 ADAD research, Rev AI for the cloud base set and Wav2Vec for the Local set [10, 26], and one was  
207 selected for its industry-leading performance, IBM for cloud-based and Whisper for local [30, 31].

### 208 **2.6. Aggregation of Transcripts**

209 Once the manual transcripts were processed and the audio files were transcribed, we combined  
210 and organized all of the new transcripts based on each interview. For each interview, there were  
211 10 transcripts that could be used to train separate models to compare transcript methodology

## Optimization of NLP Approach to Identify Alzheimer’s Disease

212 performances. The final transcript types that we combined and used were as follows: Unchanged  
213 Manual Transcript, Manual Transcript Interviewer Removed (also known as participant only),  
214 Wav2Vec Standard, Wave2Vec Enhanced, Rev AI standard, Rev AI enhanced, Whisper Standard,  
215 Whisper Enhanced, IBM Standard, and IBM Enhanced. These transcripts were all combined  
216 in an Excel spreadsheet, where each row included interview information and 10 subsequent  
217 transcriptions using each methodology. Interviews that were unable to be transcribed through one  
218 of the methodologies were dropped from the data, 18 interviews were removed in total: 9 from  
219 control, 7 from AD, 2 from MCI, and 0 from Possible AD. The final sizes of each diagnosis group  
220 in this study were 233 samples of Control, 227 samples of Probable AD, 40 samples of MCI, and 21  
221 samples of Possible AD (Table 1).

| Diagnosis   | Probable AD | Possible AD | MCI | Control |
|-------------|-------------|-------------|-----|---------|
| Reported    | 244         | 87          | 23  | 121     |
| Available   | 234         | 21          | 42  | 242     |
| Transcribed | 227         | 21          | 40  | 233     |

Table 1: Comparison of Dataset Size Before and After Processing and Transcription. Only includes diagnosis types used in final models. Dataset versions, from top to bottom, refer to what was indicated by the database datasheet, what was available to download, and what was successfully transcribed by all methodologies.

## 222 2.7. Creation of Embeddings

223 Embeddings were created using the OpenAI second-generation embedding model, called text-  
224 embedding-ada-002. An interpretation of word embeddings can be seen in Figure 1. First proposed  
225 in Agbavor and Liang, the first-generation OpenAI embedding models showed extremely promising  
226 results, contributing to an approach that achieved an accuracy of 80.3% [10]. Using the Python  
227 Pandas library, a data analysis package for Python, the combined transcripts were loaded as a data

---

## Optimization of NLP Approach to Identify Alzheimer's Disease

228 frame [32]. Using this data frame and an OpenAI API key, we created a program that created  
229 embeddings for all the transcripts using the second-generation embedding model through API  
230 requests to OpenAI's servers [9]. Pricing for the OpenAI second-generation embeddings model is  
231 \$0.0004 per 1000 tokens (which is slightly less than a word) or around 3,000 pages per dollar (USD),  
232 which is much cheaper than the various first-generation models, which had worse performance and  
233 ranged from 6 to 300 pages per dollar (USD) [33].

### 234 **2.8. SMOTE**

235 Once embeddings were created, we applied the Synthetic Minority Over-sampling Technique  
236 (SMOTE) to balance out the datasets. Balanced datasets are essential for machine learning classifier  
237 performance [34]. SMOTE can be accessed through the imbalanced-learn library for Python [35].  
238 SMOTE is an algorithm that performs data augmentation and balancing by creating synthetic data  
239 based on the original minority data points. SMOTE works by selecting random minority data points,  
240 estimating their Euclidian distance from their k nearest neighbors, then multiplying the distance  
241 between the parent point and each k nearest neighbor by a random number between 1 and 0, and  
242 then adding up those values to create a vector that is applied to the parent data point to create the  
243 synthetic one [34]. Simply, SMOTE estimates the general area of the minority samples and creates  
244 synthetic samples in that general area to balance out the datasets. SMOTE was applied to the MCI  
245 and Possible diagnosis types, increasing their sample sizes from 40 and 21 to 100 each (Fig. 5). The  
246 final size of each diagnosis type, including synthetic data, is 233 samples of Control (unchanged),  
247 227 samples of Probable AD (unchanged), 100 samples of MCI, and 100 samples of Possible AD.

## Optimization of NLP Approach to Identify Alzheimer's Disease

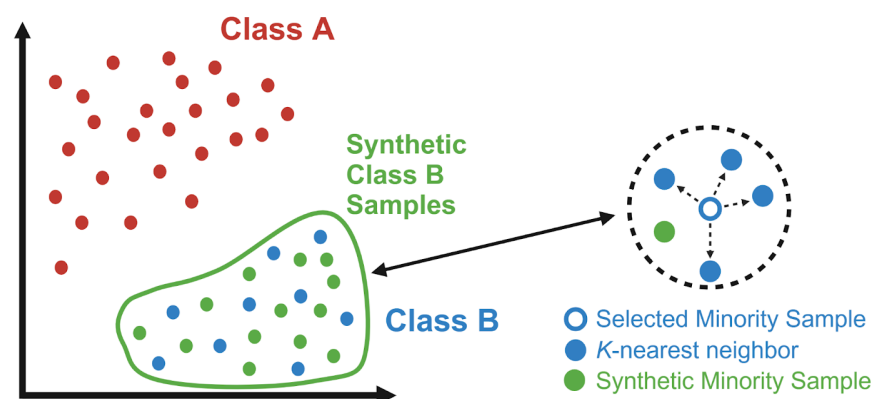

Figure 5: Visual Interpretation of Synthetic Minority Oversampling Technique. Since there were large imbalances in the data used in this study, SMOTE was used to create synthetic data for the minority data classes. Specifically, the large difference between AD and Control, which both had around 230 samples, and MCI and Possible AD, which both had less than 50, meant that synthetic samples were needed for the latter classes in order to balance the dataset to produce effective classification models. As seen in the Figure, SMOTE works by estimating the general area of the minority data groups (Class B) by selecting random minority data samples, calculating their distance from their K-nearest neighbors, and then generating synthetic samples with a similar distance from the selected data point. Made with BioRender.

### 248 **2.9. Data Subgroups for Classifier Models**

249 Since SMOTE is not a perfect technique for data augmentation, as it still relies on past data to  
250 create synthetic data, some degree of bias will be introduced into models using data augmented by  
251 SMOTE. Therefore, for the proposed comparisons that this study is trying to achieve, we created  
252 several models for each transcription methodology using different combinations of diagnosis types  
253 (Table 2). The first data subgroup that we used for model training used all the Control and AD  
254 samples (approximately 230 each). This set of data gave us the most unbiased results as it lacked  
255 any synthetic data and used all the data samples available for those two subgroups. The second is a

## Optimization of NLP Approach to Identify Alzheimer's Disease

256 subgroup that only used the downsized sample sizes for Control and AD (100 each). This subgroup  
257 lacks any bias from synthetic data but does not use all the data available (for Control and AD) so  
258 that it can be used for comparisons with other studies that have similar sample sizes. The third is a  
259 subgroup that only uses the downsized sample sizes for Control and AD and uses the synthetically  
260 upscaled MCI sample size (100 each). This data will have some bias as the MCI data type has been  
261 augmented with SMOTE, and not all the samples of AD and Control will be used as the sample size  
262 for each class needs to be equal. The final subgroup used 100 samples of all the datatypes: Control,  
263 AD, MCI, and Possible AD. This model will have the most bias since two of its classes have been  
264 augmented using SMOTE.

| Data Group  | Complete Transcribed Dataset | Transcribed Dataset Augmented With SMOTE | AD and Control (230x) | AD and Control (100x) | AD, MCI, and Control (100x) | AD, MCI, Possible AD, and Control (100x) |
|-------------|------------------------------|------------------------------------------|-----------------------|-----------------------|-----------------------------|------------------------------------------|
| Probable AD | 227                          | 227                                      | 227                   | 100                   | 100                         | 100                                      |
| MCI         | 40                           | 100                                      | 0                     | 0                     | 100                         | 100                                      |
| Possible AD | 21                           | 100                                      | 0                     | 0                     | 0                           | 100                                      |
| Control     | 233                          | 233                                      | 233                   | 100                   | 100                         | 100                                      |

Table 2: Separation of Transcript Groups into 4 Separate Subgroups. All transcripts derived (manually and using ASR) from the Pitt Corpus of the Dementia Bank database included samples from 4 diagnosis types: Control, AD, MCI, and Possible AD. As seen in the table, once minority classes were augmented using SMOTE, transcripts were organized into four subgroups. The names of each of these subgroups include the shortened name of each diagnosis contained, as well as by either (230x) or (100x) to indicate the number of samples for each diagnosis in the group. For data pools that were downsized for certain data groups, samples were randomly selected.

### 265 **2.10. SVM Training and Testing**

266 For diagnosis classifications, this study used a Support Vector Classifier (SVC). A visual interpretation  
267 of an SVC can be seen in Figure 6. In Agbavor and Liang, SVCs were shown to have the best  
268 classification performance when compared to Random Forest (RF) and Logistic Regression (LR)



## Optimization of NLP Approach to Identify Alzheimer's Disease

269 classifiers for the binary classification of AD and Control [10]. Building upon this research, we  
270 have chosen to train various SVCs using all 4 subgroups for every transcription group/methodology.  
271 SVCs and SVMs can be accessed using the SciKit-Learn platform and Python library [36]. The  
272 NumPy and Pandas Python libraries were imported and used to format and process data/results  
273 [37, 38], and the Matplotlib Python library was used to export model performances in a graphical  
274 format [39].

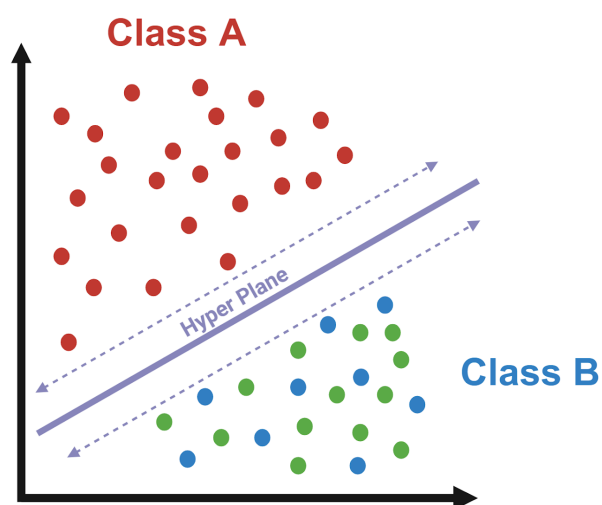

Figure 6: Visual Interpretation of a Support Vector Machine Classifier. To classify data, an SVM classifier, or SVC, was used. An SVC was chosen to be the ML classifier based on past research, which indicated its increased performance when compared to other classifiers, such as random forest or neural networks. SVCs work by separating data groups with a hyperplane. This hyperplane is chosen in such a way that it maximizes the margin between the different classes of data. The data points closest to the hyperplane on either side are known as support vectors, and they essentially define the position and orientation of the hyperplane by acting as a margin. Made with BioRender.

275 The first model that was trained for every data subgroup used an 80/20 train test split. Commencing  
276 with data preprocessing, the dataset was divided into distinct components, namely an 80% training  
277 set and a 20% testing set. To characterize the trained models' full capabilities and potentials, we used

## Optimization of NLP Approach to Identify Alzheimer's Disease

---

278 the capabilities of the GridSearchCV object, which systematically traversed an array of parameter  
279 combinations (regularization parameter C, kernel selection, polynomial degree (where relevant),  
280 and the kernel coefficient gamma) through cross-validation (CV) finding the most effective settings  
281 for each model. Upon successful completion of the tuning process, the highest-performing model  
282 was automatically selected, and it was subsequently retrained utilizing the determined optimal  
283 hyperparameters. For hyperparameter tuning, only the training data was used. Using this optimally  
284 tuned SVM classifier, the model performance was quantified using the unseen test data. All models  
285 (for each transcript methodology) used the transcripts of the same interviews for their own training  
286 and testing samples to allow for a more accurate direct comparison.

287 A second SVM classifier was created to test model generalizability using a 10-fold cross-  
288 validation technique. We executed an 80/10/10 train-validation-test split to rigorously evaluate the  
289 performance of a Support Vector Machine (SVM) classifier with a linear kernel. In this code, we  
290 performed k-fold cross-validation, where k is set to 10, to evaluate the performance of a Support  
291 Vector Machine (SVM) classifier with a linear kernel. My dataset was initially split into 10  
292 approximately equal and stratified subsets. Each of these subsets, referred to as “folds,” played a  
293 distinct role in the cross-validation process. During each iteration of the loop, one fold served as  
294 the validation set, while the remaining nine folds were used for training a linear SVM model. The  
295 “random\_state” was set for each fold to ensure reproducibility and uniqueness. With each trained  
296 model, we then made predictions on the validation set and assessed its performance. The results of  
297 each fold, encompassing all the performance metrics, were collected in separate lists, allowing for  
298 the evaluation of the SVM model’s ability to generalize effectively across different subsets of the  
299 data.

## 300 **3. Results**

### 301 **3.1. Performance Metrics**

302 The main performance metrics used by this study are accuracy, precision, recall, and F-1 Score.  
303 These metrics are commonly used and are the de facto standard for quantifying machine learning  
304 classification performance. These metrics are built of the True/False Positive (TP) (FP) and  
305 True/False Negative (TN) (FN) values of each model. Accuracy quantifies the overall percentage  
306 of samples that were correctly classified. Precision is a metric that reveals what percentage of the  
307 samples marked true are, in fact, true. Recall is a metric that reveals what percentage of true samples  
308 were marked as TP. F-1 score combines precision and recall, representing their harmonic mean [40].

$$309 \text{ Precision} = \frac{TP}{TP + TN} \quad (1)$$

$$\text{Recall} = \frac{TP}{FN + TP} \quad (2)$$

$$\text{Accuracy} = \frac{TP + TN}{FP + FN + TP + TN} \quad (3)$$

$$\text{F1} = \frac{2 \cdot \text{Precision} \cdot \text{Recall}}{\text{Precision} + \text{Recall}} \quad (4)$$

### 310 **3.2. Results for 80/20 Train Test Split**

311 The complete results of all models (for all data subgroups within each transcription methodology)  
312 using the 80/20 Train technique can be found in Tables 3-6. The Train Test Split Test reveals the

## Optimization of NLP Approach to Identify Alzheimer’s Disease

| Transcript Group   | Type             | Model            | Accuracy | Precision | Recall | F-1  |
|--------------------|------------------|------------------|----------|-----------|--------|------|
| Manual Transcripts | Unchanged        | Train Test Split | 0.87     | 0.86      | 0.87   | 0.87 |
|                    |                  | 10-Fold CV       | 0.82     | 0.82      | 0.82   | 0.82 |
|                    | Participant Only | Train Test Split | 0.89     | 0.90      | 0.87   | 0.88 |
|                    |                  | 10-Fold CV       | 0.84     | 0.85      | 0.84   | 0.84 |
| IBM Cloud          | Standard         | Train Test Split | 0.94     | 0.94      | 0.94   | 0.94 |
|                    |                  | 10-Fold CV       | 0.76     | 0.76      | 0.76   | 0.75 |
|                    | Enhanced         | Train Test Split | 0.91     | 0.90      | 0.91   | 0.91 |
|                    |                  | 10-Fold CV       | 0.72     | 0.73      | 0.72   | 0.72 |
| Rev AI             | Standard         | Train Test Split | 0.96     | 0.95      | 0.96   | 0.96 |
|                    |                  | 10-Fold CV       | 0.77     | 0.78      | 0.76   | 0.76 |
|                    | Enhanced         | Train Test Split | 0.79     | 0.79      | 0.78   | 0.78 |
|                    |                  | 10-Fold CV       | 0.77     | 0.77      | 0.76   | 0.76 |
| Wav2Vec            | Standard         | Train Test Split | 0.88     | 0.88      | 0.87   | 0.88 |
|                    |                  | 10-Fold CV       | 0.73     | 0.74      | 0.73   | 0.73 |
|                    | Enhanced         | Train Test Split | 0.99     | 0.99      | 0.99   | 0.99 |
|                    |                  | 10-Fold CV       | 0.79     | 0.79      | 0.79   | 0.79 |
| Open AI Whisper    | Standard         | Train Test Split | 0.93     | 0.93      | 0.93   | 0.93 |
|                    |                  | 10-Fold CV       | 0.81     | 0.81      | 0.81   | 0.81 |
|                    | Enhanced         | Train Test Split | 0.93     | 0.93      | 0.93   | 0.93 |
|                    |                  | 10-Fold CV       | 0.80     | 0.81      | 0.80   | 0.80 |

Table 3: AD and Control (230x) Results. Includes performance metrics for all ten transcription types. Shows data for 80/20 train test split model, which used 80% of data for training and 20% for testing, as well as the 10-Fold CV, which separated data into ten folds and trained ten models using a different fold for testing every time.

313 performance of a trained and optimized model on an untrained test set. This simulates the potential  
 314 of the model to perform on a real-life test set when it is optimized with more real-life data; in other  
 315 words, the performance the model could achieve if more data were collected - its peak possible  
 316 performance. It does this by tuning hyperparameters by training and testing dozens of models on the  
 317 original training set to simulate the enhancement of the model. These results are measured using  
 318 accuracy, precision, recall, and F-1. Table 1 is divided up firstly by ASR program, then by type of  
 319 audio or manual transcription, and then by each data subgroup. This test can be used to make the  
 320 most direct and accurate comparisons possible, as each methodology will have the same interviews  
 321 for their training and testing data. Comparisons between models are only applicable within each  
 322 data group since each group uses a different dataset size and complexity.

323 For the AD and Control (230x) subgroup, accuracy ranged from 0.79 to 0.99, and F-1 Scores

## Optimization of NLP Approach to Identify Alzheimer’s Disease

| Transcript Group   | Type             | Model            | Accuracy | Precision | Recall | F-1  |
|--------------------|------------------|------------------|----------|-----------|--------|------|
| Manual Transcripts | Unchanged        | Train Test Split | 0.93     | 0.93      | 0.93   | 0.93 |
|                    |                  | 10-Fold CV       | 0.74     | 0.77      | 0.74   | 0.73 |
|                    | Participant Only | Train Test Split | 0.89     | 0.92      | 0.86   | 0.88 |
|                    |                  | 10-Fold CV       | 0.80     | 0.85      | 0.80   | 0.79 |
| IBM Cloud          | Standard         | Train Test Split | 0.98     | 0.97      | 0.98   | 0.98 |
|                    |                  | 10-Fold CV       | 0.72     | 0.74      | 0.72   | 0.71 |
|                    | Enhanced         | Train Test Split | 0.89     | 0.88      | 0.89   | 0.88 |
|                    |                  | 10-Fold CV       | 0.72     | 0.73      | 0.71   | 0.71 |
| Rev AI             | Standard         | Train Test Split | 0.98     | 0.98      | 0.97   | 0.98 |
|                    |                  | 10-Fold CV       | 0.63     | 0.66      | 0.62   | 0.60 |
|                    | Enhanced         | Train Test Split | 1.00     | 1.00      | 1.00   | 1.00 |
|                    |                  | 10-Fold CV       | 0.65     | 0.67      | 0.65   | 0.64 |
| Wav2Vec            | Standard         | Train Test Split | 0.84     | 0.83      | 0.84   | 0.84 |
|                    |                  | 10-Fold CV       | 0.73     | 0.74      | 0.72   | 0.72 |
|                    | Enhanced         | Train Test Split | 1.00     | 1.00      | 1.00   | 1.00 |
|                    |                  | 10-Fold CV       | 0.75     | 0.76      | 0.75   | 0.75 |
| Open AI Whisper    | Standard         | Train Test Split | 0.91     | 0.92      | 0.90   | 0.90 |
|                    |                  | 10-Fold CV       | 0.79     | 0.81      | 0.79   | 0.79 |
|                    | Enhanced         | Train Test Split | 0.91     | 0.92      | 0.90   | 0.90 |
|                    |                  | 10-Fold CV       | 0.78     | 0.80      | 0.78   | 0.77 |

Table 4: AD and Control (100x) Results. Includes performance metrics for all ten transcription types. Shows data for 80/20 train test split model, which used 80% of data for training and 20% for testing, as well as the 10-Fold CV, which separated data into ten folds and trained ten models using a different fold for testing every time.

324 ranged from 0.78 to 0.99 (Table 3). The data for the Ad and Control (230x) can be found in  
 325 Table 1, which shows all models’ performance using the Train Test Split test, as well as Table 3,  
 326 which only includes data from the AD and Control (230x) models using the Train Test Split. The  
 327 best-performing model was the Wav2Vec Enhanced model. It achieved an accuracy of 0.99 and an  
 328 F-1 Score of 0.99. The second best model was the Rev AI Standard model. This model achieved an  
 329 accuracy of 0.96 and an F-1 Score of 0.96. The worst-performing model was REV AI Enhanced.  
 330 This model only managed to achieve an accuracy of 0.79 and an F-1 Score of 0.78. The second  
 331 worst performing model was the model using the Manual Transcripts Unchanged, which achieved  
 332 an accuracy and F-1 Score of 0.87.

333 For the AD and Control (100x) subgroup, performance overall improved with accuracy and F-1  
 334 Scores ranging from 0.84 to 1.00 (Table 4). The best-performing models were Rev AI Enhanced

## Optimization of NLP Approach to Identify Alzheimer’s Disease

| Transcript Group   | Type             | Model            | Accuracy | Precision | Recall | F-1  |
|--------------------|------------------|------------------|----------|-----------|--------|------|
| Manual Transcripts | Unchanged        | Train Test Split | 0.97     | 0.97      | 0.96   | 0.97 |
|                    |                  | 10-Fold CV       | 0.52     | 0.56      | 0.52   | 0.52 |
|                    | Participant Only | Train Test Split | 0.98     | 0.99      | 0.98   | 0.98 |
|                    |                  | 10-Fold CV       | 0.54     | 0.59      | 0.54   | 0.53 |
| IBM Cloud          | Standard         | Train Test Split | 0.95     | 0.95      | 0.95   | 0.95 |
|                    |                  | 10-Fold CV       | 0.53     | 0.54      | 0.53   | 0.52 |
|                    | Enhanced         | Train Test Split | 0.90     | 0.90      | 0.89   | 0.90 |
|                    |                  | 10-Fold CV       | 0.55     | 0.55      | 0.55   | 0.54 |
| Rev AI             | Standard         | Train Test Split | 0.91     | 0.92      | 0.91   | 0.90 |
|                    |                  | 10-Fold CV       | 0.45     | 0.48      | 0.45   | 0.43 |
|                    | Enhanced         | Train Test Split | 0.94     | 0.93      | 0.94   | 0.93 |
|                    |                  | 10-Fold CV       | 0.46     | 0.48      | 0.46   | 0.45 |
| Wav2Vec            | Standard         | Train Test Split | 0.94     | 0.95      | 0.93   | 0.94 |
|                    |                  | 10-Fold CV       | 0.55     | 0.59      | 0.55   | 0.52 |
|                    | Enhanced         | Train Test Split | 0.95     | 0.96      | 0.95   | 0.95 |
|                    |                  | 10-Fold CV       | 0.55     | 0.55      | 0.55   | 0.53 |
| Open AI Whisper    | Standard         | Train Test Split | 0.92     | 0.93      | 0.91   | 0.92 |
|                    |                  | 10-Fold CV       | 0.54     | 0.58      | 0.54   | 0.54 |
|                    | Enhanced         | Train Test Split | 0.94     | 0.94      | 0.93   | 0.93 |
|                    |                  | 10-Fold CV       | 0.56     | 0.59      | 0.56   | 0.55 |

Table 5: AD, MCI, and Control (100x) Results. Includes performance metrics for all ten transcription types. Shows data for 80/20 train test split model, which used 80% of data for training and 20% for testing, as well as the 10-Fold CV, which separated data into ten folds and trained ten models using a different fold for testing every time.

335 and Wav2vec Enhanced, which both scored 1.00 for accuracy and F-1. The second-best models  
 336 were IBM Cloud Standard and Rev AI Standard, which both achieved an accuracy and F-1 Score of  
 337 0.98. Manual Transcript Participant Only and IBM Cloud Enhanced were tied for second worst,  
 338 both scoring 0.89 for accuracy and 0.88 for F-1 Score. The worst-performing model for the AD and  
 339 Control (100x) Subgroup was Wav2Vec Standard, which scored 0.84 for accuracy and 0.84 for F-1  
 340 Score.

341 The performance continued to increase for the third data Subgroup, AD, MCI, and Control  
 342 (100x), as seen in Table 5, ranging from an accuracy and F-1 Score of 0.98 and 0.98 to 0.90 and  
 343 0.90, a smaller range than the previous models. The most effective model was the Manual Transcript  
 344 Participant Only, which scored 0.98 for accuracy and 0.98 for F-1. The next best model was Manual  
 345 Transcript Unchanged, with an accuracy of 0.97 and 0.97 F-1. For the third best, there was a tie

## Optimization of NLP Approach to Identify Alzheimer’s Disease

| Transcript Group   | Type             | Model            | Accuracy | Precision | Recall | F-1  |
|--------------------|------------------|------------------|----------|-----------|--------|------|
| Manual Transcripts | Unchanged        | Train Test Split | 0.90     | 0.91      | 0.89   | 0.89 |
|                    |                  | 10-Fold CV       | 0.50     | 0.53      | 0.50   | 0.47 |
|                    | Participant Only | Train Test Split | 0.90     | 0.90      | 0.90   | 0.89 |
|                    |                  | 10-Fold CV       | 0.56     | 0.60      | 0.56   | 0.54 |
| IBM Cloud          | Standard         | Train Test Split | 0.95     | 0.95      | 0.95   | 0.95 |
|                    |                  | 10-Fold CV       | 0.51     | 0.53      | 0.51   | 0.50 |
|                    | Enhanced         | Train Test Split | 0.96     | 0.96      | 0.96   | 0.96 |
|                    |                  | 10-Fold CV       | 0.52     | 0.55      | 0.52   | 0.51 |
| Rev AI             | Standard         | Train Test Split | 0.94     | 0.94      | 0.94   | 0.94 |
|                    |                  | 10-Fold CV       | 0.44     | 0.46      | 0.44   | 0.41 |
|                    | Enhanced         | Train Test Split | 0.88     | 0.87      | 0.87   | 0.87 |
|                    |                  | 10-Fold CV       | 0.52     | 0.54      | 0.52   | 0.50 |
| Wav2Vec            | Standard         | Train Test Split | 0.89     | 0.90      | 0.88   | 0.88 |
|                    |                  | 10-Fold CV       | 0.58     | 0.60      | 0.58   | 0.56 |
|                    | Enhanced         | Train Test Split | 0.93     | 0.93      | 0.92   | 0.92 |
|                    |                  | 10-Fold CV       | 0.57     | 0.58      | 0.57   | 0.56 |
| Open AI Whisper    | Standard         | Train Test Split | 0.89     | 0.89      | 0.89   | 0.89 |
|                    |                  | 10-Fold CV       | 0.55     | 0.59      | 0.55   | 0.55 |
|                    | Enhanced         | Train Test Split | 0.94     | 0.93      | 0.94   | 0.93 |
|                    |                  | 10-Fold CV       | 0.55     | 0.59      | 0.55   | 0.53 |

Table 6: AD, MCI, Possible AD, and Control (100x) Results. Includes performance metrics for all ten transcription types. Shows data for 80/20 train test split model, which used 80% of data for training and 20% for testing, as well as the 10-Fold CV, which separated data into ten folds and trained ten models using a different fold for testing every time.

346 between IBM Cloud Standard and Wav2Vec Enhanced, which both scored 0.95 for accuracy and F-1  
 347 Score. The second worst model was Rev AI, with an accuracy of 0.91 and an F-1 Score of 0.90.  
 348 This was followed by IBM Cloud Enhanced, the worst model, which scored 0.90 for accuracy and  
 349 F-1 Score.

350 The overall performance for the last data subgroup, AD, MCI, Possible AD, and Control (100x),  
 351 decreased from the last group, but the range stayed consistent, only ranging from accuracy and F-1  
 352 Score of 0.96 and 0.96 to 0.88 and 0.87 (Table 6). The best two models for this subgroup both used  
 353 the IBM Cloud ASR program. The best was IBM Cloud Enhanced, which scored 0.96 for accuracy  
 354 and 0.96 for F-1 Score. IBM Cloud Standard was second, scoring 0.95 for accuracy and 0.95 for F-1  
 355 Score. The second worst model was Wav2Vec Standard, which scored 0.89 for accuracy and 0.88  
 356 for F-1. The worst was Rev AI Enhanced, which scored 0.88 for accuracy and 0.87 for F-1 Score.

---

## Optimization of NLP Approach to Identify Alzheimer's Disease

### 357 **3.3. Complete Results for 10-Fold Cross-Validation**

358 The 10-fold Cross-Validation was used to assess and evaluate the ability of each machine learning  
359 model to generalize using the average results of 10 machine learning models using a different test set  
360 each time. This model gives a more realistic result of how a model would perform in its current form  
361 on a real-life test set, while the Train Test Split shows the model's potential performance. Because  
362 of the nature of Cross-Validation, the random groups or folds it splits the data into, make it less  
363 accurate at making direct and precise comparisons of models that used the same data.

364 The overall results for the 10-fold Cross-Validation tests were lower across the board than the  
365 Train Test Split, as can be seen in Tables 3-6. For the AD and Control (230x) subgroup, the best  
366 performing model was Manual Transcript Participant Only, which scored 0.84 for accuracy and 0.84  
367 for F-1 Score (Table 3). The second best was Manual Transcript Unchanged, which scored 0.82 for  
368 both accuracy and F-1 score. The worst model was IBM Cloud Enhanced, which only scored 0.72  
369 for accuracy and F-1 Score. The overall scores were lower, and the range, which spanned from 0.84  
370 to 0.72 for both accuracy and F-1 Score, was smaller than the train test split test.

371 For the AD and Control (100x) Subgroup, the best performing model was Manual Transcript  
372 Participant Only, which scored 0.80 for accuracy and 0.79 for F-1 Score (Table 4). The second  
373 best was Whisper Standard, which scored 0.79 for both accuracy and F-1 Score. The worst model  
374 was Rev AI standard, which scored 0.63 for accuracy and 0.60 for F-1 Score. The scores for this  
375 subgroup ranged from 0.80 to 0.63 for accuracy and 0.79 to 0.60 for F-1. For the third subgroup, AD,  
376 MCI, and Control (100x), the overall performance continued to decrease (Table 5). The best model  
377 was Whisper Enhanced, which scored 0.56 for accuracy and 0.55 for F-1. The worst model was Rev  
378 AI Standard, which scored 0.45 for accuracy and 0.43 for F-1 score. The size range decreased, only  
379 spanning from 0.56 to 0.45 for accuracy and 0.55 to 0.43 for F-1 score. The 4th subgroup, AD,



---

## Optimization of NLP Approach to Identify Alzheimer's Disease

380 MCI, Possible AD, and Control (100x), performed the worst in this test, having scores ranging from  
381 0.58 to 0.44 for accuracy and from 0.56 to 0.41 for F-1 Score (Table 6). The best model was the  
382 Wav2Vec Standard, which had a score of 0.58 for accuracy and 0.56 for F-1 score. The worst was  
383 Rev AI Standard, which scored 0.44 for accuracy and 0.41 for F-1 Score.

## 384 4. Discussion

### 385 4.1. Data Used for Direct Comparisons and Observations of Transcription 386 Methodologies

387 The data used for making direct comparisons between transcription methods will be the AD and  
388 Control (230x) subgroups. AD and Control (230x) will also be used to posit the most effective model  
389 as a whole created by this study. This group has the lowest amount of bias as it does not include any  
390 synthetic data and uses all the data available to it. Furthermore, for comparisons between models,  
391 we will use the data from the Train Test SVM classifier, as all models (within the same subgroup)  
392 used samples from the same exact interview for their respective training and testing groups, which is  
393 not the case for the Cross-Validation test.

394 AD and Control (100x) will be used to make overall comparisons to other studies that have  
395 predominantly used smaller databases of a similar size to this data group, such as the ADReSSO  
396 challenge and data set, which has a size of 237 samples, around 120 samples per group. ADReSSO  
397 is a recurring competition that aims to create the best model for detecting and differentiating between  
398 AD and Control diagnosis using any audio-based method [41]. This subgroup lacks any bias from  
399 synthetic data, but since it does not use all of the data available to it, it can not find the most accurate  
400 results possible for each methodology and thus will not be used for direct comparisons between

---

## Optimization of NLP Approach to Identify Alzheimer's Disease

---

401 methodologies.

402 The last two data subgroups will be used to analyze the preliminary possibility of detecting MCI  
403 and Possible AD, as these subgroups include some degree of bias from synthetic data.

### 404 **4.2. AD and Control (100x) Subgroup Results and Comparison to Previous** 405 **Studies**

406 The results of the AD and Control (100x) subgroup are very promising. As stated earlier, 4 models  
407 achieved perfect or near-perfect results: Rev AI Enhanced and Wav2vec Enhanced, which performed  
408 perfectly (accuracy and F-1 of 1.00), as well as IBM Cloud Standard and Rev AI Standard which  
409 were near perfect (accuracy and F-1 of 0.98). Five of the remaining models achieved scores around  
410 the low 90s and high 80s, which are still extremely impressive. The Wav2Vec Standard scored 0.84  
411 for accuracy and F-1 Score, which was still quite good despite being the worst-performing model.  
412 When comparing the Train Test Split scores to the Cross Validation results, they were overall much  
413 lower, only ranging from 0.80 to 0.63 for accuracy and 0.79 to 0.60 for F-1 Score. This discrepancy  
414 is most extreme for some of the best-performing models in the Train Test Split test, which performed  
415 near the bottom for cross-validation. This is the case for the Rev AI Standard and Enhanced, which  
416 only scored 0.63 and 0.65 for accuracy and 0.60 and 0.64 for F-1 Score, and not for Wav2Vec  
417 Enhanced and IBM Cloud Standard.

418 While this discrepancy between the performance of the Train Test Split and Cross-Validation  
419 in the Rev AI models is a possible indicator of overfitting, usually caused by a data leakage or a  
420 data set that is too small (which this dataset is at risk of), the results of the Wav2Vec Standard  
421 model give the other results of this data subgroup credence for comparisons with other studies  
422 [42]. This is because when examining the results of Agbavor and Liang, which used a methodology  
423 nearly identical to the Wav2Vec Standard, being trained on the ADReSSo data set (120 for both

## Optimization of NLP Approach to Identify Alzheimer's Disease

---

424 AD and Control), using the standard audio of the study, and using Wav2Vec transcriptions, which  
425 were turned into embeddings using the GPT first-gen models, their performance is very similar.  
426 While we achieved 0.84 for accuracy and F-1 (train test) for the Wav2Vec Standard methodology,  
427 they scored 0.803 for accuracy and 0.829 for F-1 using an SVC [10]. Therefore, while some of the  
428 models are suffering from overfitting due to their poor generalizability when compared to Train  
429 Test data, the similar performances of the Wav2Vec Standard methodology show that the rest of  
430 the transcript methodologies are much more effective overall than the previously used Wav2Vec  
431 Standard transcription methodology. This large improvement in performance indicates that through  
432 the optimization of transcriptions, the performance of embedding-based AD detection programs can  
433 be improved dramatically.

### 434 **4.3. Interpretation of AD and Control (230x) Subgroup**

435 Overall, the performance of the models using the AD and Control (230x) remained excellent. The  
436 best model by far was Wav2Vec enhanced, which achieved an accuracy and F-1 of 0.99. Besides both  
437 Manual Transcript methodologies, Rev AI Enhanced, and Wav2Vec Standard method, the remaining  
438 five methodologies (Both IBM Cloud, Open AI Whisper, and Rev AI Standard) had excellent  
439 performances, all achieving F-1 and accuracies between 0.91 and 0.96, which still outperform  
440 almost all other automated AD detection systems. The performance of both Manual Transcripts and  
441 Wav2Vec Standard was still quite good, scoring just below 0.90 in the upper 80s. The only poorly  
442 performing model was Rev AI Enhanced, which only was able to score an accuracy of 0.79 and an  
443 F-1 Score of 0.78.

444 When compared to the results of the AD and Control (100x) Subgroup, the performance of the  
445 AD and Control (230x) Subgroup was much more consistent, which is to be expected when a larger  
446 sample size is used. The best-performing model was still Wav2Vec Enhanced, whose accuracy and

## Optimization of NLP Approach to Identify Alzheimer's Disease

---

447 Precision only decreased by 0.01 to 0.99 when using more data samples. The other models that  
448 performed extremely well using the smaller dataset, Rev AI Enhanced/Standard and IBM Cloud  
449 Standard, had their Train Test performances decrease and their CV performances increase. While  
450 Rev AI standard and IBM Cloud Standard were still the second and third best models using the  
451 Train Test Split and the larger dataset, Rev AI Enhanced became the worst, having a similar train  
452 test split performance to its CV scores (0.77 for accuracy and 0.76 for F-1). When we compare  
453 the Train Test Split results to the CV results, the gap is smaller with the larger dataset (AD and  
454 Control (230x)) than with the smaller one (AD and Control 130x)). Similarly, the best-performing  
455 models for the larger dataset using the Train Test Split test (Wav2Vec Enhanced, Rev AI Standard,  
456 and IBM Cloud Standard) were not the worst models when it came to the CV, all scoring near the  
457 middle of the pack. Since the gap between the Train Test Split and CV results decreased, and the  
458 overall performances between both tests became more consistent, the larger database clearly helped  
459 mitigate the overfitting experienced by the models using the AD and Control (100x) data subgroup.

### 460 **4.4. Negative Impact of Interviewer on Model Performance**

461 When comparing both of the Manual Transcript methodologies, one can observe that there is a  
462 minor difference in performance. While the Manual Transcripts Unchanged model scored 0.87  
463 for both accuracy and F-1, the Manual Transcripts Participant Only model scored 0.89 and 0.88  
464 for accuracy and F-1, respectively. This improvement in performance indicates that it could be  
465 advantageous in the long run to remove interviewers from audio transcripts. This could be done in  
466 two ways, either by instructing the interviewer to begin the recording after the instructions, having  
467 the interviewer say a start and stop phrase between questions (so that their words could be removed),  
468 or through some sort of AI implementation (through voice recognition technology). Since more  
469 data is needed to more thoroughly test some of the methods proposed by this study and others so that

---

## Optimization of NLP Approach to Identify Alzheimer's Disease

470 a real-world application can be made, these suggestions should be taken into consideration when  
471 collecting data for a new database.

### 472 **4.5. AI Transcription Models Outperforming Manual Transcripts**

473 Interestingly, almost all of the AI-based ASR methodologies outperformed the pre-existing manual  
474 transcripts, despite some transcripts not having the same quality as the manual transcripts. For  
475 example, one phrase was manually transcribed as “the scene is in the in the kitchen, the mother  
476 is wiping dishes,” while Wav2Vec Standard transcribed it as “THE SEM IS IN E BIN KITCHEN  
477 A MOTHER IS WIPING DISHES.” Wav2Vec Standard outperformed the Manual Transcripts  
478 unchanged methodology with these poorer transcripts. The reason for this improved performance  
479 with poorer transcripts is unclear and requires further examination of transcript quality and research.  
480 One possible explanation is that the AI transcripts were unable to capture “filler”/“function” words  
481 (Pronouns, Prepositions, Conjunctions, and Interjections) that don't convey as much meaning as  
482 “content” words (Adjectives, Nouns, Verbs), which tend to be longer and more distinct.

### 483 **4.6. Effect of Audio Enhancement**

484 There was no clear advantage to enhancing the quality of audio files. In some cases, standard  
485 audio outperformed enhanced Audio, such as in the while in others, enhanced audio performed  
486 better. Interestingly, using the more advanced cloud-based transcription programs, the standard  
487 audio performed consistently better. This worsened performance when using audio enhancement  
488 with cloud-based programs might be caused by the fact that these models have been trained with  
489 background noise in mind, and thus, the background noise removal of audio enhancement presents  
490 no advantages to these models, only disadvantages, as it might cause confusing noise artifacts. On  
491 the other hand, when using the Wav2Vec method (local), audio enhancement was extremely helpful,

---

## Optimization of NLP Approach to Identify Alzheimer's Disease

492 which indicates that it struggles heavily when presented with unclear audio. For Whisper, the other  
493 local method, there was no effect of using audio enhancement. Therefore, it would only make sense  
494 to use audio enhancement for locally-based ADAD systems.

### 495 **4.7. Most Effective Methodology for Real-World Applications**

496 Since the real-world application of a speech-based automatic detection of AD program would be  
497 greatly affected by the distinction between using a locally-based and cloud-based methodology, it is  
498 of great importance to identify and differentiate between the best methodologies using each type of  
499 technology for future research and implementations. While a locally based ADAD service would  
500 have the advantage of perfect privacy and the lack of needing to pay for API or Cloud fees (as all  
501 computations would be run locally and thus would not have to be saved on external servers), it  
502 would require the use of a powerful computer which could have high upfront costs. Alternatively,  
503 cloud-based systems need only minimal hardware (enough for a user interface) and a connection to  
504 the internet but would incur constant charges due to their use of cloud computing. Furthermore, a  
505 cloud system might cause privacy concerns among patients.

506 Based on the results of the AD and Control (230x) subgroup, the best methodology for a locally  
507 based system Wav2Vec Enhanced methodology. This methodology not only performed the best  
508 out of the Locally based transcription methods, scoring 0.99 for both accuracy and F-1 but was  
509 the most effective method overall. The second best overall and best cloud-based methodology was  
510 the TalkBank proposed Rev AI methodology (using standard audio files). This methodology was  
511 able to score an impressive 0.96 for both accuracy and F-1 Score. Overall, taking into account  
512 all ASR methods, neither system completely outperformed the other, showing that either type of  
513 implementation would be effective. Regardless, before any real-world implementation could be  
514 used, further research and testing would be necessary for either of these models.

---

## Optimization of NLP Approach to Identify Alzheimer's Disease

### 515 **4.8. Interpretation of Remaining Subgroups**

516 The results of the AD, MCI, and Control (100x) and AD, MCI, Possible AD, and Control (100x)  
517 subgroups were promising but suffered heavily from overfitting, which is to be expected when using  
518 synthetic data. While SMOTE can be used to create synthetic data with a lower probability of  
519 suffering from overfitting, it is still possible. While the range of the AD, MCI, and Control (100x)  
520 using the train test split was excellent, ranging from 0.98 to 0.90 for accuracy and 0.98 to 0.98 for F-1,  
521 the results of the CV test were quite poor. For accuracy, models only ranged from scoring 0.56 to  
522 0.45, and for F-1, 0.55 to 0.43. While the Train Test Results are extremely promising, the CV results  
523 show that the models trained on this subset perform quite poorly when it comes to generalizability.

524 The most effective models for the AD, MCI, Possible AD, and Control (100x) subgroup using  
525 the Train Test Split were the IBM Cloud ones, which scored 0.96 (Enhanced) and 0.95 (Standard)  
526 for both accuracy and F-1. The worst model (Rev AI Enhanced) still did quite well, scoring 0.88 for  
527 accuracy and 0.87 for F-1 Score. Similarly to the previous subgroup, the range for the Train Test  
528 Split test was very good, while the range of the CV scores was much poorer. The CV range for this  
529 data subgroup only spanned from 0.58 to 0.44 for accuracy and from 0.56 to 0.41 for F-1 Score.

530 As discussed previously, a large discrepancy between the Train Test and CV is highly indicative  
531 of overfitting. Since the Pitt Corpus is one of the largest databases of Spontaneous Speech, future  
532 research focused on collecting more data for MCI and Possible AD audio samples is necessary so  
533 that the results created by this study (for the final two subgroups) could be verified using original  
534 samples.

## 535 **5. Conclusion and Future Research**

536 The results of this research show that with the current state of audio enhancement algorithms, AI-  
537 based ASR programs, AI-generated word embeddings, and machine learning classifiers, an accurate  
538 automatic speech-based AD detection system is possible. Furthermore, both these systems could be  
539 deployed through local or cloud-based computing, as both technologies produced machine-learning  
540 classification models that achieved near-perfect results when classifying between AD and a Control.  
541 To detect other diagnoses, such as MCI, more audio data is necessary for more accurate and reliable  
542 results.

543 Before any of these systems can be rolled out, more audio data (in addition to clinical trials) is  
544 necessary. These models were all trained using data from one specific area and time and, therefore,  
545 suffer from some intrinsic biases. A real-world application of this technology would need data from  
546 all over the world for each language, considering the various dialects and varying vernaculars that  
547 heavily influence speech. Unfortunately, current publicly available databases are highly limited, with  
548 the Pitt Corpus used by this study ranking as one of the largest databases available [4]. Therefore,  
549 the collection of new data and the creation of new databases are essential for the advancement of  
550 this technology.

551 Additionally, since data collection is vital to allow further research in this area, studies planning  
552 on creating new datasets should ensure not to include interviewers' unaffected speech. This speech  
553 creates unhelpful biases in addition to being noisy data, lowering the overall effectiveness of the  
554 models produced.

555 Understanding why the poorer quality AI transcripts largely outperformed the higher quality  
556 manual transcripts is essential to further improving automatic AD detection. This would enable the  
557 further optimization of these proposed methodologies by enabling the removal of noisy data and



---

## Optimization of NLP Approach to Identify Alzheimer's Disease

558 giving insights into the parts of speech that are most important for speech-based detection systems.

### 559 **6. Acknowledgments**

560 Figures were made with the help of BioRender.com, a web-based tool that helps scientists create, edit  
561 and collaborate on scientific diagrams and illustrations. Publishing rights were acquired using an  
562 academic subscription. This work was supported by the National Institute on Aging grant numbers  
563 NIA AG03705 and AG05133, through the funding of the Pitt Corpus.

## Optimization of NLP Approach to Identify Alzheimer's Disease

---

### 564 **References**

- 565 [1] 2023 alzheimer's disease facts and figures. *Alzheimer's & Dementia: The Journal of the*  
566 *Alzheimer's Association*, 19(4):1598–1695, 2023. doi: 10.1002/alz.13016.
- 567 [2] World alzheimer report 2023 reducing dementia risk: never too early, never too late. <https://www.alzint.org/u/World-Alzheimer-Report-2023.pdf>. Accessed: 2024-01-02.  
568
- 569 [3] C. Laske, H. R. Sohrabi, S. Frost, et al. Innovative diagnostic tools for early detection of  
570 alzheimer's disease. *Alzheimer's & Dementia*, 11(5):561–578, 2014. doi: 10.1016/j.jalz.2014.  
571 06.004.
- 572 [4] I. Vigo, L. Coelho, and S. Reis. Speech- and language-based classification of alzheimer's disease:  
573 A systematic review. *Bioengineering*, 9(1):27, 2022. doi: 10.3390/bioengineering9010027.
- 574 [5] J. Onofre, Paulo MinettT., and Karin Zazo Ortiz. Analysis of word number and content in  
575 discourse of patients with mild to moderate alzheimer's disease. *Dementia & Neuropsychologia*,  
576 8(3):260–265, 2014. doi: 10.1590/s1980-57642014dn83000010.
- 577 [6] M. Dashwood, G. Churchhouse, M. Young, and T. Kuruvilla. Artificial intelligence as an aid  
578 to diagnosing dementia: an overview. *Progress in Neurology and Psychiatry*, 25(3):42–47,  
579 2021. doi: 10.1002/pnp.721.
- 580 [7] P. M. Nadkarni, L. Ohno-Machado, and W. W. Chapman. Natural language processing: an  
581 introduction. *Journal of the American Medical Informatics Association*, 18(5):544–551, 2011.  
582 doi: 10.1136/amiajnl-2011-000464.
- 583 [8] Q. Jiao and S. Zhang. A brief survey of word embedding and its recent development, 2021.
- 584 [9] A. Neelakantan, T. Xu, R. Puri, et al. Text and code embeddings by contrastive pre-training.  
585 <https://arxiv.org/pdf/2201.10005.pdf>. Accessed: 2024-01-02.
- 586 [10] F. Agbavor and H. Liang. Predicting dementia from spontaneous speech using large language  
587 models. *PLOS Digital Health*, 1(12):e0000168, 2022. doi: 10.1371/journal.pdig.0000168.
- 588 [11] S. Luz, F. Haider, D. Sofia, Fromm, and B. MacWhinney. Editorial: Alzheimer's dementia  
589 recognition through spontaneous speech. *Frontiers in Computer Science*, 3, 2021. doi:  
590 10.3389/fcomp.2021.780169.
- 591 [12] K. Chlasta and Krzysztof Wo lk. Towards computer-based automated screening of dementia  
592 through spontaneous speech. *Frontiers in Psychology*, 11, 2021. doi: 10.3389/fpsyg.2020.  
593 623237.

## Optimization of NLP Approach to Identify Alzheimer's Disease

---

- 594 [13] A. Balagopalan and J. Novikova. Comparing acoustic-based approaches for alzheimer's disease  
595 detection. <https://arxiv.org/pdf/2106.01555.pdf>. Accessed: 2024-01-02.
- 596 [14] Sebastián Salazar-Colores Yamanki Santander-Cruz et al. Semantic feature extraction using  
597 sbert for dementia detection. *Brain Sciences*, 12(2):270, 2022. doi: 10.3390/brainsci12020270.
- 598 [15] J. T. Becker, F. Boller, O. L. Lopez, J. Saxton, and K. L. McGonigle. The natural history  
599 of alzheimer's disease: description of study cohort and accuracy of diagnosis. *Archives of*  
600 *Neurology*, 51(6):585–594, 1994.
- 601 [16] Dementiabank: Theoretical rationale, protocol, and illustrative analyses. [https://pubs.asha.org/doi/10.1044/2022\\_AJSLP-22-00281](https://pubs.asha.org/doi/10.1044/2022_AJSLP-22-00281). Accessed: 2024-01-02.  
602
- 603 [17] Boll spectral subtraction - file exchange - matlab centralfile exchange -  
604 matlab central. [https://www.mathworks.com/matlabcentral/fileexchange/](https://www.mathworks.com/matlabcentral/fileexchange/7675-boll-spectral-subtraction)  
605 [7675-boll-spectral-subtraction](https://www.mathworks.com/matlabcentral/fileexchange/7675-boll-spectral-subtraction), 2005. Accessed: 2024-01-02.
- 606 [18] H. Goodglass, E. Kaplan, and S. Weintraub. *BDAE: The Boston diagnostic aphasia examination*.  
607 Lippincott Williams & Wilkins, Philadelphia, PA, 2001.
- 608 [19] L. Cummings. Describing the cookie theft picture: Sources of breakdown in alzheimer's demen-  
609 tia. [https://www.researchgate.net/publication/332061806\\_Describing\\_the\\_](https://www.researchgate.net/publication/332061806_Describing_the_Cookie_Theft_picture_Sources_of_breakdown_in_Alzheimer's_dementia)  
610 [Cookie\\_Theft\\_picture\\_Sources\\_of\\_breakdown\\_in\\_Alzheimer's\\_dementia](https://www.researchgate.net/publication/332061806_Describing_the_Cookie_Theft_picture_Sources_of_breakdown_in_Alzheimer's_dementia), 2019.  
611 Accessed: 2024-01-02.
- 612 [20] Matlab version: 9.13.0 (r2022b). <https://www.mathworks.com>, 2022.
- 613 [21] S. Boll. Suppression of acoustic noise in speech using spectral subtraction. *IEEE Transactions*  
614 *on Acoustics, Speech, and Signal Processing*, 27(2):113–120, 1979. doi: 10.1109/tassp.1979.  
615 1163209.
- 616 [22] L. Budach, M. Feuerpfeil, N. Ihde, et al. The effects of data quality on machine learning  
617 performance. <https://arxiv.org/abs/2207.14529>, 2022. Accessed: 2024-01-02.
- 618 [23] A. Baevski, H. Zhou, A. Mohamed, and M. Auli. wav2vec 2.0: A framework for self-  
619 supervised learning of speech representations. <https://arxiv.org/abs/2006.11477>,  
620 2020. Accessed: 2024-01-02.
- 621 [24] T. Wolf, Lysandre Debut, V. Sanh, et al. Transformers: State-of-the-art natural language  
622 processing, 2020.
- 623 [25] B. Mcfee, C. Raffel, D. Liang, et al. librosa: Audio and music signal analysis in python. In  
624 *PROC. OF THE 14th PYTHON IN SCIENCE CONF*, 2015. URL [https://conference.](https://conference.scipy.org/proceedings/scipy2015/pdfs/brian_mcfee.pdf)  
625 [scipy.org/proceedings/scipy2015/pdfs/brian\\_mcfee.pdf](https://conference.scipy.org/proceedings/scipy2015/pdfs/brian_mcfee.pdf).

## Optimization of NLP Approach to Identify Alzheimer's Disease

---

- 626 [26] A. M. Lanzi, A. K. Saylor, D. Fromm, et al. Dementiabank: Theoretical rationale, protocol,  
627 and illustrative analyses. *American Journal of Speech-Language Pathology*, 32(2):426–438,  
628 2023. doi: 10.1044/2022\_ajslp-22-00281.
- 629 [27] D. Merkel. Docker: Lightweight linux containers for consistent development and deployment.  
630 *Linux Journal*, (239):2, 2014.
- 631 [28] Speech to text api — speech recognition service - rev ai. <https://www.rev.ai/>, 2023.  
632 Accessed: 2024-01-02.
- 633 [29] Global speech-to-text transcript error rating 2021 —  
634 statista. [https://www.statista.com/statistics/1133833/  
635 speech-to-text-transcript-accuracy-rate-among-leading-companies/](https://www.statista.com/statistics/1133833/speech-to-text-transcript-accuracy-rate-among-leading-companies/), 2021.  
636 Accessed: 2024-01-02.
- 637 [30] A. Radford, J. Kim, T. Xu, et al. Robust speech recognition via large-scale weak supervision.  
638 <https://cdn.openai.com/papers/whisper.pdf>. Accessed: 2024-01-02.
- 639 [31] R. Liddell. Next-generation watson speech to text - ibm watson  
640 speech services. [https://medium.com/ibm-watson-speech-services/  
641 next-generation-watson-speech-to-text-650fd66d95d0](https://medium.com/ibm-watson-speech-services/next-generation-watson-speech-to-text-650fd66d95d0), 2021. Accessed:  
642 2024-01-02.
- 643 [32] W. McKinney. Data structures for statistical computing in python. In *PROC. OF THE 9th*  
644 *PYTHON IN SCIENCE CONF*, page 51, 2010. URL [https://conference.scipy.org/  
645 proceedings/scipy2010/pdfs/mckinney.pdf](https://conference.scipy.org/proceedings/scipy2010/pdfs/mckinney.pdf).
- 646 [33] Openai platform. [https://platform.openai.com/docs/guides/embeddings/  
647 what-are-embeddings](https://platform.openai.com/docs/guides/embeddings/what-are-embeddings), 2023. Accessed: 2024-01-02.
- 648 [34] N. V. Chawla, K. W. Bowyer, L. O. Hall, and W. P. Kegelmeyer. Smote: Synthetic minority  
649 over-sampling technique. *Journal of Artificial Intelligence Research*, 16(1):321–357, 2002.
- 650 [35] imbalanced-learn documentation — version 0.11.0. [https://imbalanced-learn.org/  
651 stable/](https://imbalanced-learn.org/stable/), 2023. Accessed: 2024-01-02.
- 652 [36] F. Pedregosa, G. Varoquaux, A. Gramfort, et al. Scikit-learn: Machine learning in python.  
653 *Journal of Machine Learning Research*, 12(85):2825–2830, 2011.
- 654 [37] C. R. Harris, K. J. Millman, R. van Gommers, et al. Array programming with numpy. *Nature*,  
655 585(7825):357–362, 2020. doi: 10.1038/s41586-020-2649-2.
- 656 [38] W. McKinney et al. Data structures for statistical computing in python. In *Proceedings of the*  
657 *9th Python in Science Conference*, volume 445, pages 51–56, 2010.

---

## Optimization of NLP Approach to Identify Alzheimer's Disease

---

- 658 [39] J. D. Hunter. Matplotlib: A 2d graphics environment. *Computing in Science & Engineering*, 9  
659 (3):90–95, 2007.
- 660 [40] S. Raschka. An overview of general performance metrics of binary classifier systems.  
661 <https://arxiv.org/pdf/1410.5330.pdf>, 2014. Accessed: 2024-01-02.
- 662 [41] S. Luz, F. Haider, S. de la Fuente, D. Fromm, and B. MacWhinney. Detecting cognitive decline  
663 using speech only: The addresso challenge. <https://arxiv.org/abs/2104.09356>, 2021.  
664 Accessed: 2024-01-02.
- 665 [42] M. Valdenegro-Toro and M. Sabatelli. Machine learning students overfit to overfitting.  
666 <https://arxiv.org/pdf/2209.03032.pdf>, n.d. Retrieved November 8, 2023.
